# Supplementary material for: Effect of using sonicated sulphuric acid as an electrolyte in a lead acid battery
Source: Royal Society of Chemistry journal article supplement (doi:10.1039/c5ra17286a), 2015-01-01
Supplement: c5ra17286a1.pdf [file c5ra17286a1.pdf]

## Effect of using sonicated sulphuric acid as an electrolyte in lead acid battery

S Mithin kumar, Sundar Mayavan\*, M.Ganesan, S Ambalavanan\*

### Supporting Information

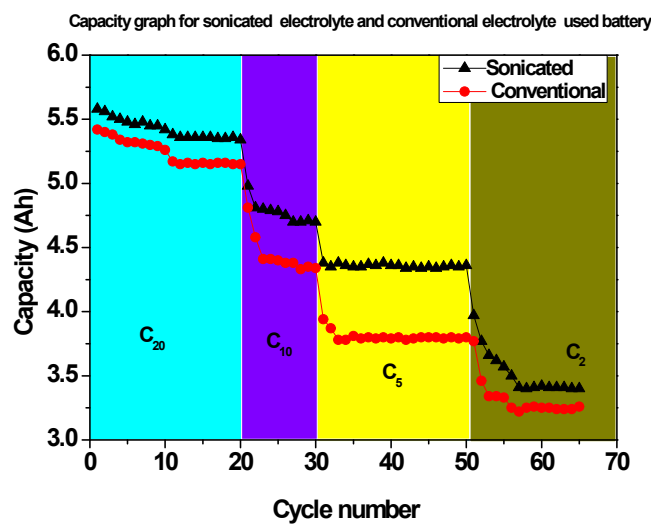

Figure S1 (a): Comparison between sonicated and conventional lead acid battery (12V/5Ah; Make: AMCO) capacity at different rates of discharge

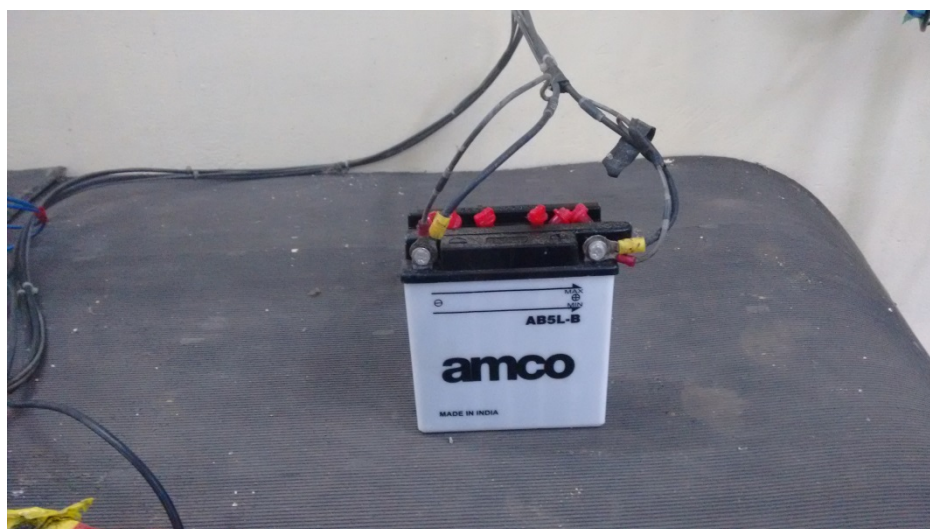

Figure S1 (b) Digital image of battery used for testing.
